# Supplementary material for: Comprehensive characterization of endometrial competing endogenous RNA network in infertile women of childbearing age
Source: publisher site journal article supplement (doi:10.18632/aging.102874), 2020-02-29
Supplement: Supplementary file [file aging-v12i5-102874-supplementary-material-SD1.pdf]

## SUPPLEMENTARY FIGURES

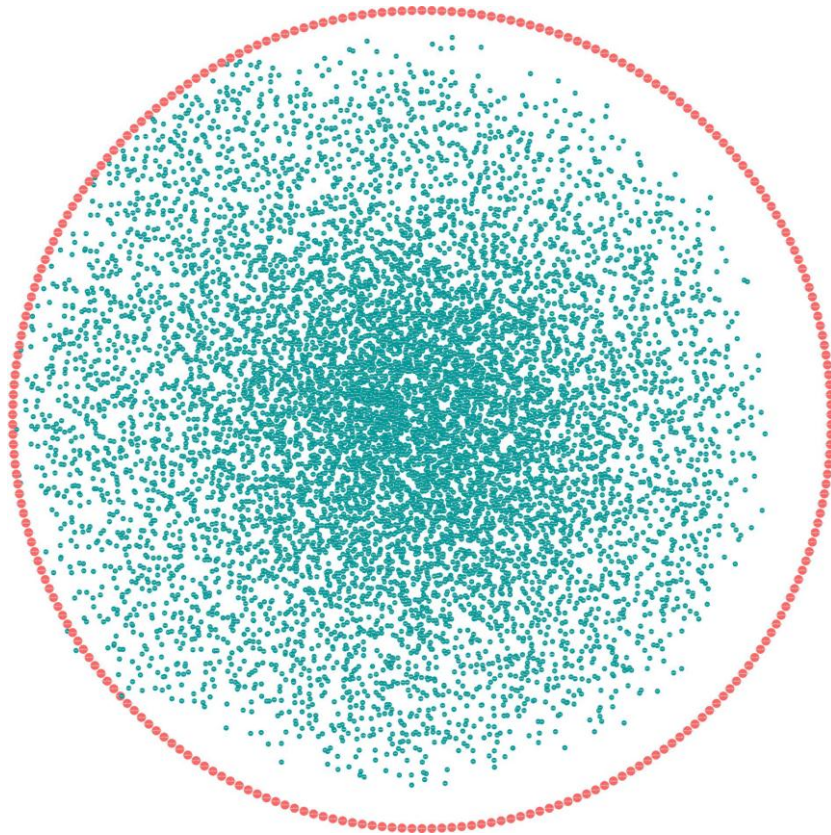

**Supplementary Figure 1.** Target genes of the differentially expressed miRNAs in endometriosis. Pink dots, miRNA, blue dots, mRNA.

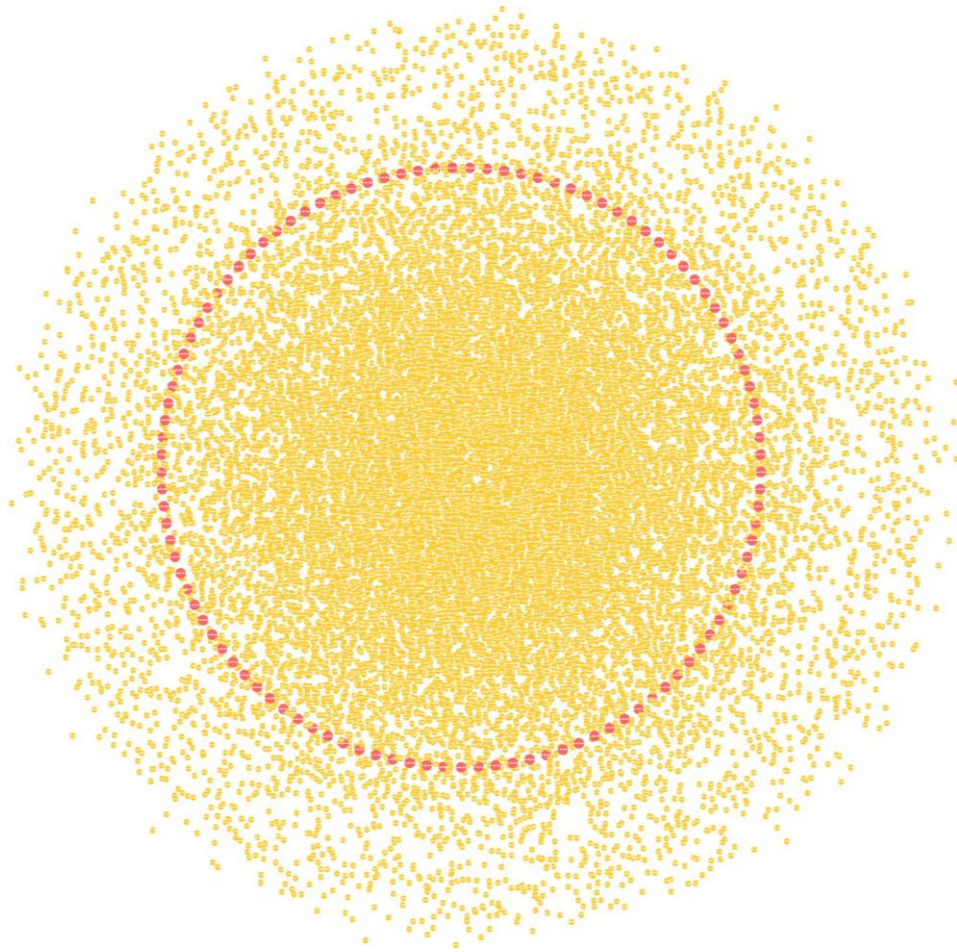

**Supplementary Figure 2. Target lncRNAs of the differentially expressed miRNAs in endometriosis.** Pink dots, miRNA, yellow dots, lncRNAs.

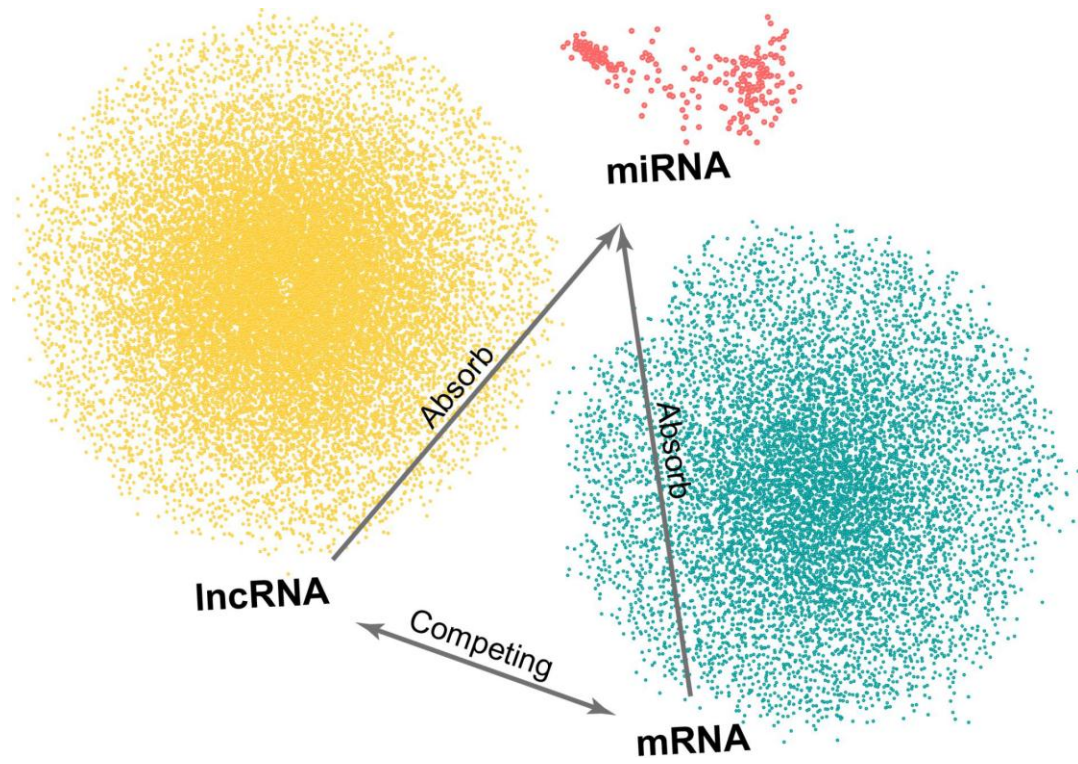

**Supplementary Figure 3. Triple network of mRNA-miRNA-lncRNA in endometriosis.** Pink dots, miRNA, yellow dots, lncRNAs, blue dots, mRNA.
